# Supplementary material for: Pentraxin-3 modulates hepatocyte ferroptosis and the innate immune response in LPS-induced liver injury
Source: PubMed Central journal article supplement (PMC11638432; doi:10.1186/s43556-024-00227-6), 2024-12-12
Supplement: 43556_2024_227_MOESM1_ESM.pdf [file 43556_2024_227_MOESM1_ESM.pdf]

**Fig. S1. Western blot analysis expression of IL1 $\beta$  in PTX3-ko and WT mice at 0h and 72h after injection with 10 mg/kg LPS (n = 5 mice per group).**

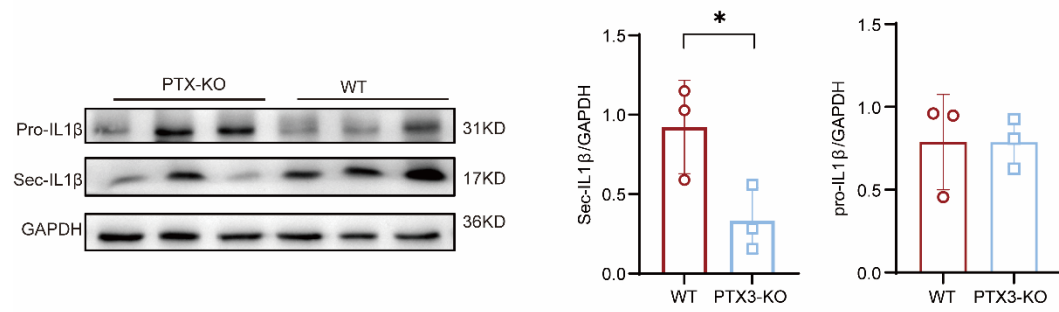

Fig. S2.

(a) Fluorescence microscopy confirmed the efficiency of PTX3 in AML12 cell lines. (original magnification =  $\times 200$ , scale bar =  $100 \mu\text{m}$ )

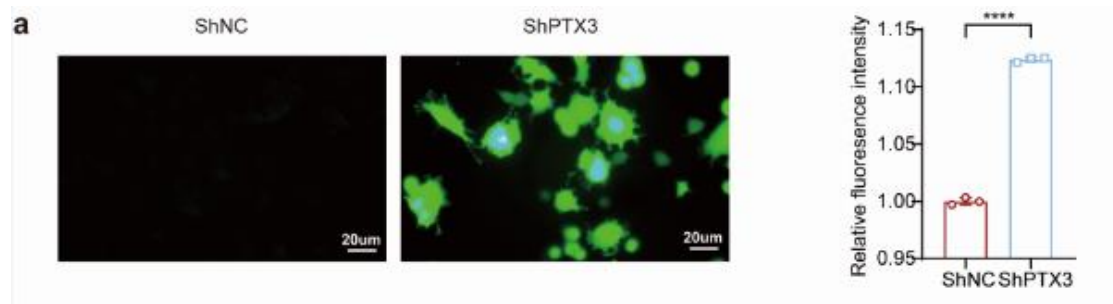

(b,c) qRT-PCR tested the efficiency of PTX3 in AML12 cell lines and hepatocytes isolated from mice (n=3).

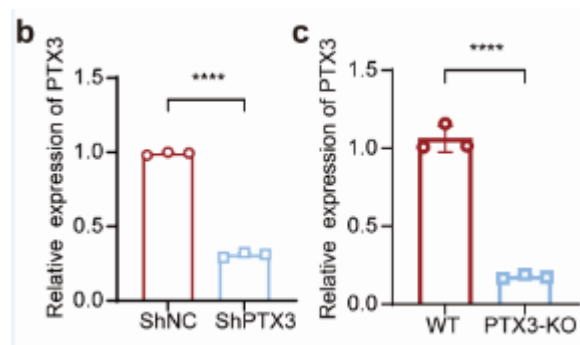

qRT-PCR detected the expression of TFRC (d) and HO-1 (e) in mouse AML12 cells with or without PTX3 knock down after treated with 10 ng/mL LPS for 12h (n=3).

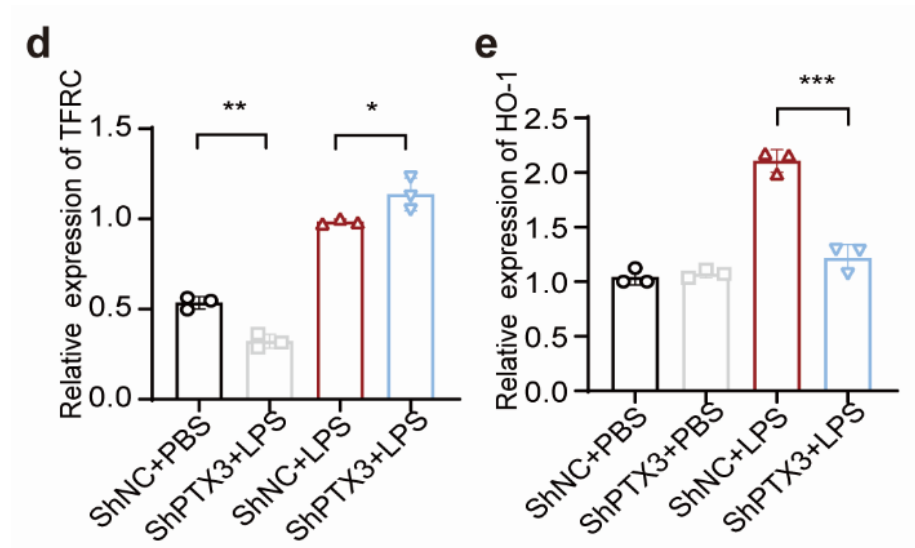

(f) The levels of Lipid peroxide (red) in mouse liver primary hepatocytes after treated with 10 ng/mL LPS for 12h (n=3). (original magnification =  $\times 400$ , scale bar = 20 $\mu\text{m}$ )

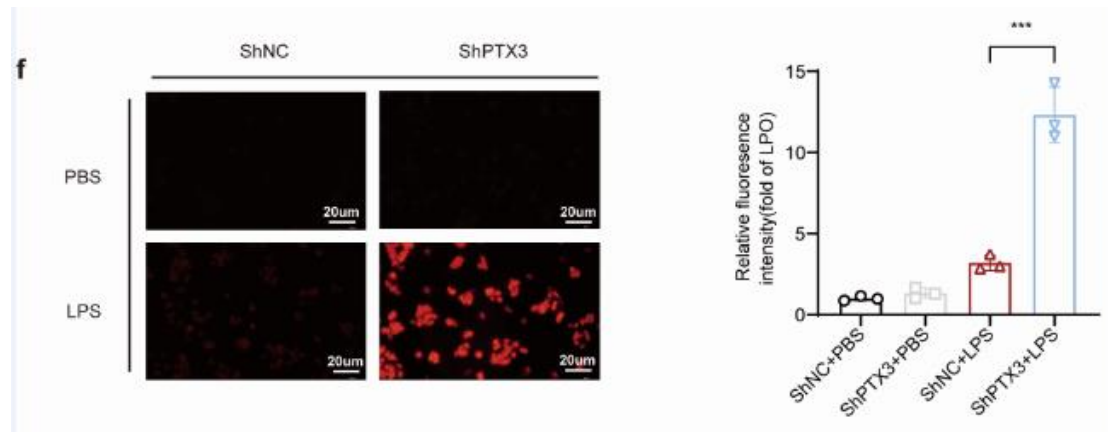

(g) Intracellular  $\text{Fe}^{2+}$  levels measured by FerroOrange (red) with 10 ng/mL LPS for 24h (n=3). (original magnification =  $\times 200$ , scale bar = 100 $\mu\text{m}$ )

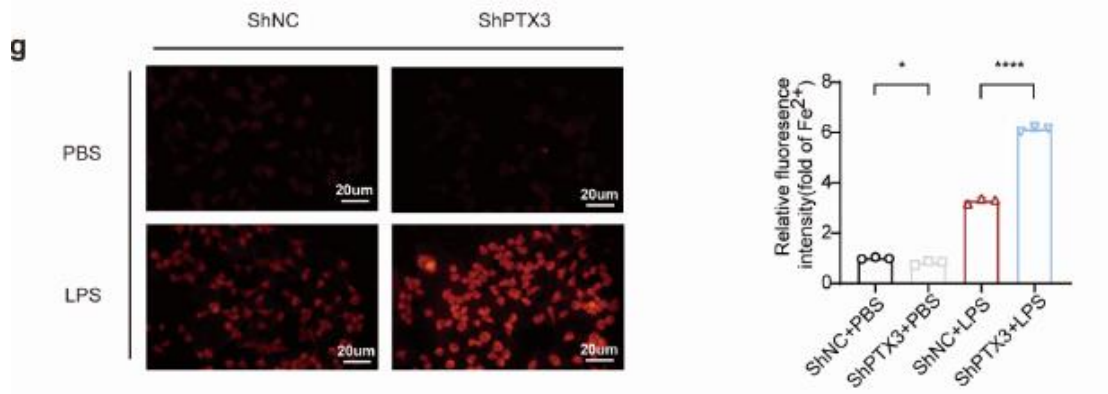

(h) ROS levels in mouse liver primary hepatocytes measured by MitoSOX Dye Red with 10 ng/mL LPS for 12h (n=3). (original magnification =  $\times 200$ , scale bar = 100 $\mu\text{m}$ )

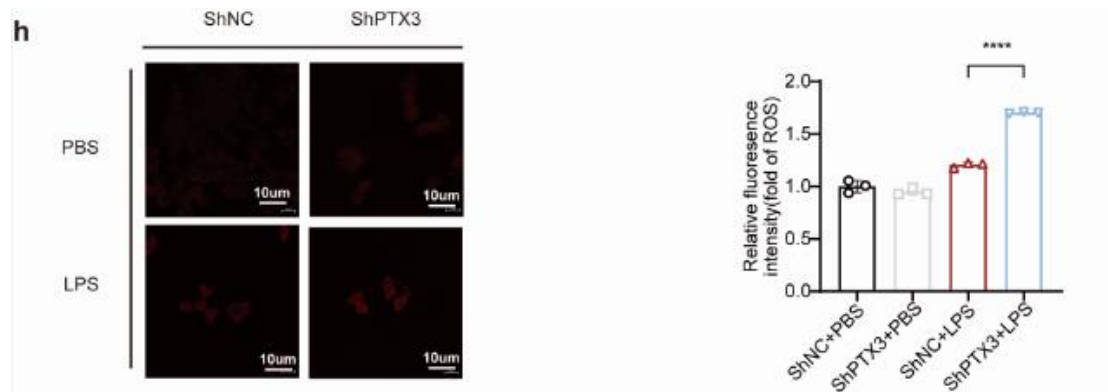

**Fig. S3. qRT-PCR (a) and western blot (b) detected the expression of cell death models in AML12 cells with or without PTX3 knockout after treated with 10 ng/mL LPS for 12h.**

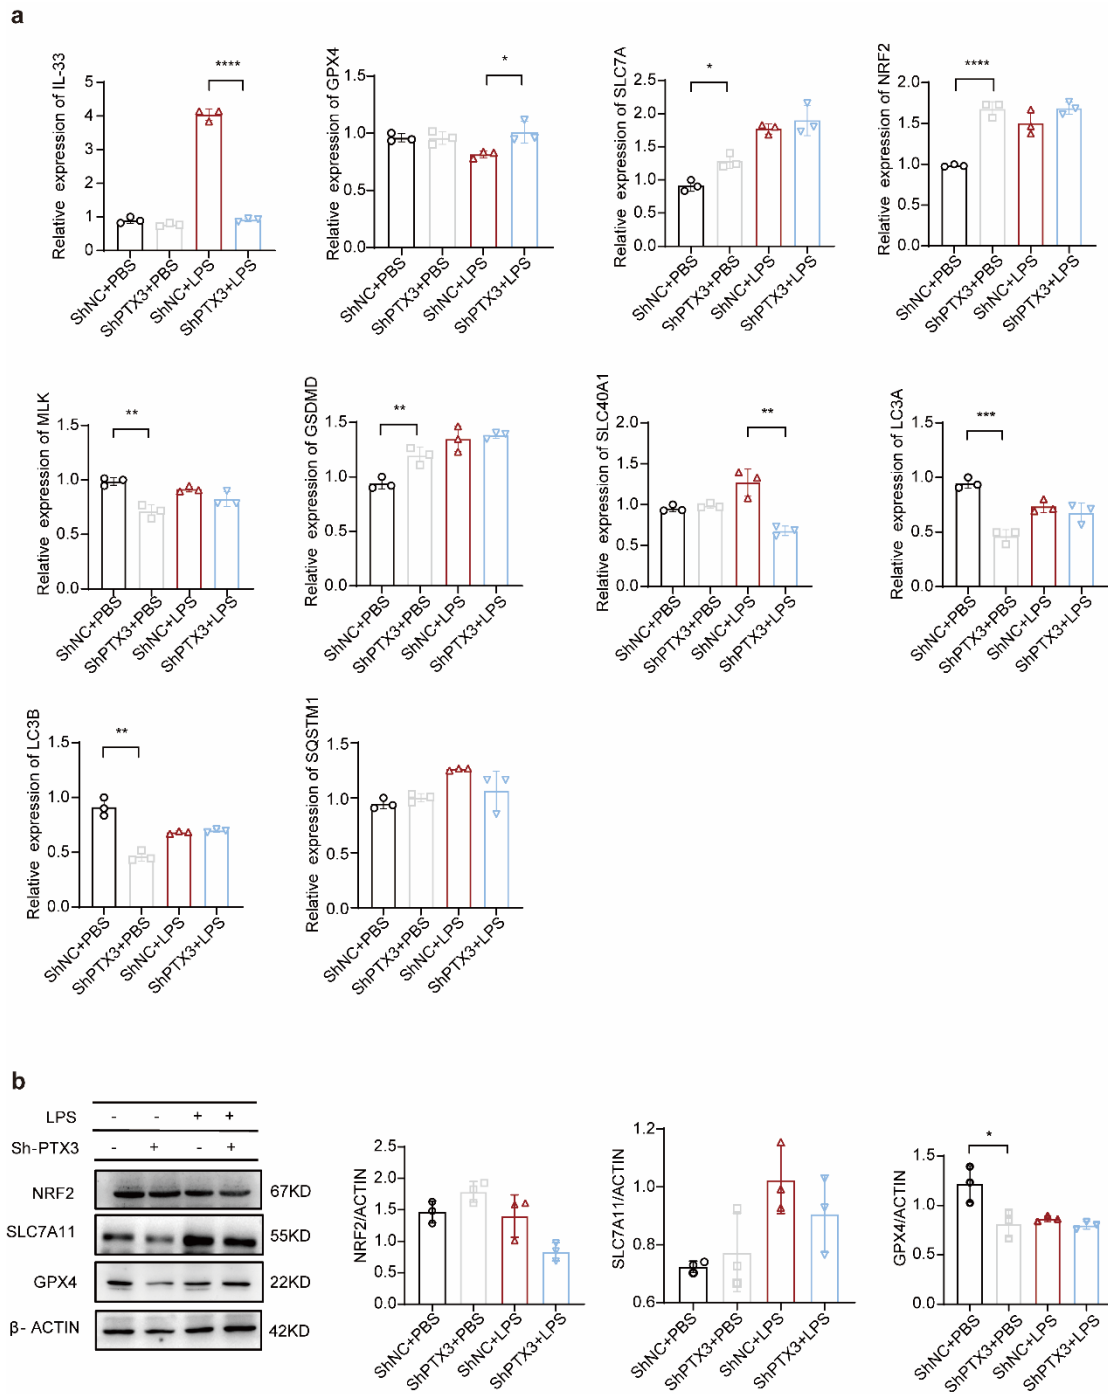

**Fig. S4.** qRT-PCR(a) and ELISA(b) detected the expression of CCL20 in mouse liver primary hepatocytes from WT and PTX3<sup>-/-</sup> after treated with 10 ng/mL LPS for 12h. And 10 $\mu$ M ferroptosis inhibitors Ferrostatin-1 for 12h reduced CCL20 secretion. 20 $\mu$ M ferroptosis inducer Erastin increased the levels of CCL20 (n=3).

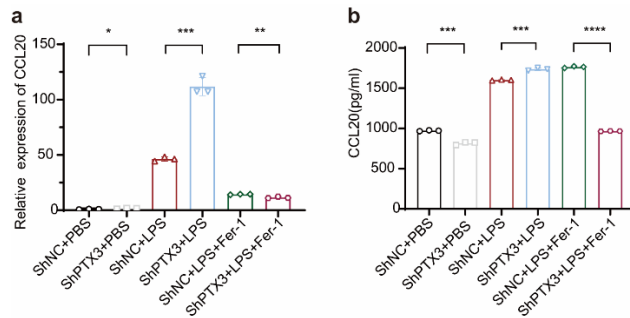

(c,d) qRT-PCR detected the expression of *Ccl20* in J774 cells and Raw264.7 cells after treated with 10 ng/mL LPS.

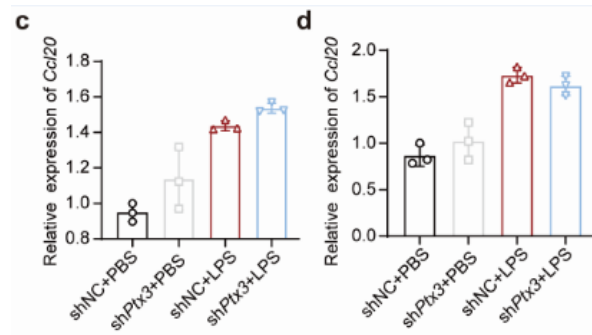

(e) western blot detected the expression of CCR5 in J774 cells with or without *Ptx3* knockdown after treated with LPS.

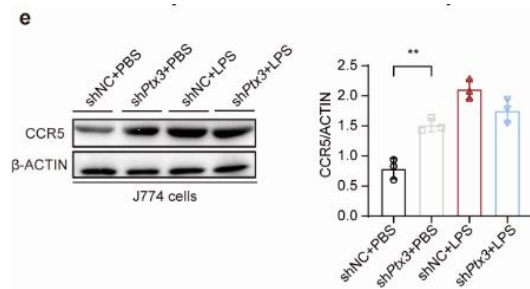

(f,g) qRT-PCR detected the expression of *Ccr6* in J774 cells and Raw 264.7 cells with or without *Ptx3* knockdown after treated with CCL20 recombinant proteins.

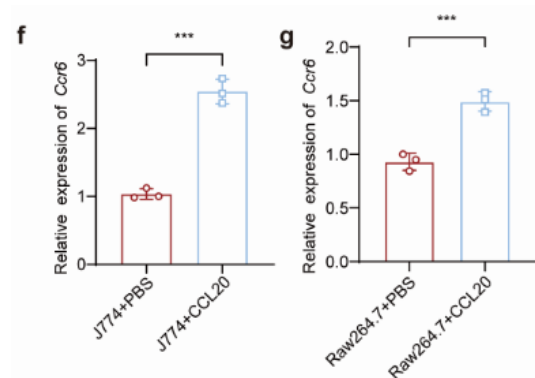

**Fig. S5. qRT-PCR(a) and Elisa (b) tested the efficiency of knock down PTX3 (n=3). Cell migration was tested via crystal violet staining(c) (n=5). (original magnification = 200×, scale bar = 100μm)**

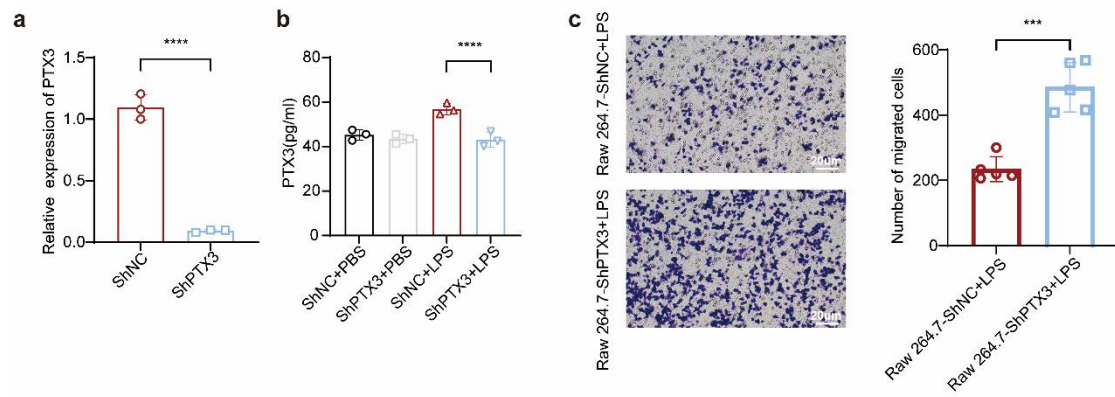

**Table S1**

| <b>Gene</b>    | <b>Species</b> | <b>Forward primer</b>    | <b>Reverse primer</b>    |
|----------------|----------------|--------------------------|--------------------------|
| CCL20          | Mice           | GTGGGTTTCACAAGACAGATGGC  | CCAGTTCTGCTTTGGATCAGCG   |
| PTX3           | Mice           | AAGTGGAACCCCTATGAGATTCAG | CCAGCTTGTTCCTTTCCACC     |
| GAPDH          | Mice           | CATCACTGCCACCCAGAAGACTG  | ATGCCAGTGAGCTTCCCCTTCAG  |
| IL-33          | Mice           | CTACTGCATGAGACTCCGTTCTG  | AGAATCCCCTGGATAGGCAGAG   |
| TNF- $\alpha$  | Mice           | GGGTTGTACCTTGTCTACTCCCAG | GAGATAGCAAATCGGCTGACG    |
| GSDMD          | Mice           | GCGCTTTGTTCCATCGGAAAG    | CCATTTCCAAGCTCTCCAGTTCTG |
| MLKL           | Mice           | GAATACCGTTTTAGATGTCAGCC  | CTTCCACGTAATTTGCAACTG    |
| TFRC           | Mice           | GAAGTCCAGTGTGGGAACAGGT   | CAACCACTCAGTGGCACCAACA   |
| IL-1 $\beta$   | Mice           | TGGACCTTCCAGGATGAGGACA   | GTTTCATCTCGGAGCCTGTAGTG  |
| Slc7a11/xCT    | Mice           | CTTTGTTGCCCTCTCCTGCTTC   | CAGAGGAGTGTGCTTGTGGACA   |
| Arg1           | Mice           | AAGAATGGAAGAGTCAGTGTGG   | GGGAGTGTGATGTCAGTGTG     |
| CD68           | Mice           | GCTTCTGCTGTGGAAATGCAAG   | TGAGCAGCCTGTAGCCTTAGAGA  |
| CD86           | Mice           | ACGTATTGGAAGGAGATTACAGCT | TCTGTGAGCCTTACTATCCCAGC  |
| Gpx4           | Mice           | CCGGCTACAACGTCAAGTTTG    | CCCTTGGGCTGGACTTTTCATC   |
| Nrf2/Nfe2l2    | Mice           | TTCCCATTTGTAGATGACCATGAG | CTCCATGTCCTGCTCTATGCTG   |
| HO-1/Hmox1     | Mice           | CACTCTGGAGATGACACCTGAG   | GTGTTCTCTGTCAGCATCACC    |
| FPN1/Slc40a1   | Mice           | CCATAGTCTCTGTCAGCCTGCT   | CTTGCAGCAACTGTGTCACCGT   |
| LC3A/Map1lc3a  | Mice           | CGTCCTGGACAAGACCAAGT     | ACCATCTACAGGAAGCCGTC     |
| LC3B/Map1lc3b  | Mice           | CATGTTAACATGAGCGAGTTGGTC | GTTTCATAGATGTCAGCGATGGG  |
| NF- $\kappa$ B | Mice           | GCTGCCAAAGAAGGACACGACA   | GGCAGGCTATTGCTCATCACAG   |
| SQSTM1         | Mice           | GCTCTTCGGAAGTCAGCAAACC   | GCAGTTTCCCAGACTCCATCTGT  |
| ERK1           | Mice           | GGCTTTCTGACGGAGTATGTGG   | GTTGGAGAGCATCTCAGCCAGA   |
| ERK2           | Mice           | TCAAGCCTTCCAACCTCCTGCT   | AGCTCTGTACCAACGTGTGGCT   |
| Stat6          | Mice           | AGATCTTCAACGACAACAGCCTC  | CCAGGACACCATCAAACCACTG   |
| CCR6           | Mice           | ATGCGGTCAACTTTAACTGTGG   | CCCGGAAAGATTTGGTTGCCT    |
| IL-4           | Mice           | GAACTCTAGTGTTCATGGAGCTG  | TCTTTCAGTGATGTGGACTTGGAC |
| CD163          | Mice           | TGTTTCAGGAAGATTGGAAGTGAG | CCTCACTGGCATTAACTCGACC   |
| CD206          | Mice           | GTTTCACCTGGAGTGATGGTTCTC | AGGACATGCCAGGGTCACTTT    |
| IL-10          | Mice           | CGGGAAGACAATAACTGCACCC   | CGGTTAGCAGTATGTTGTCCAGC  |

Fig.4 d

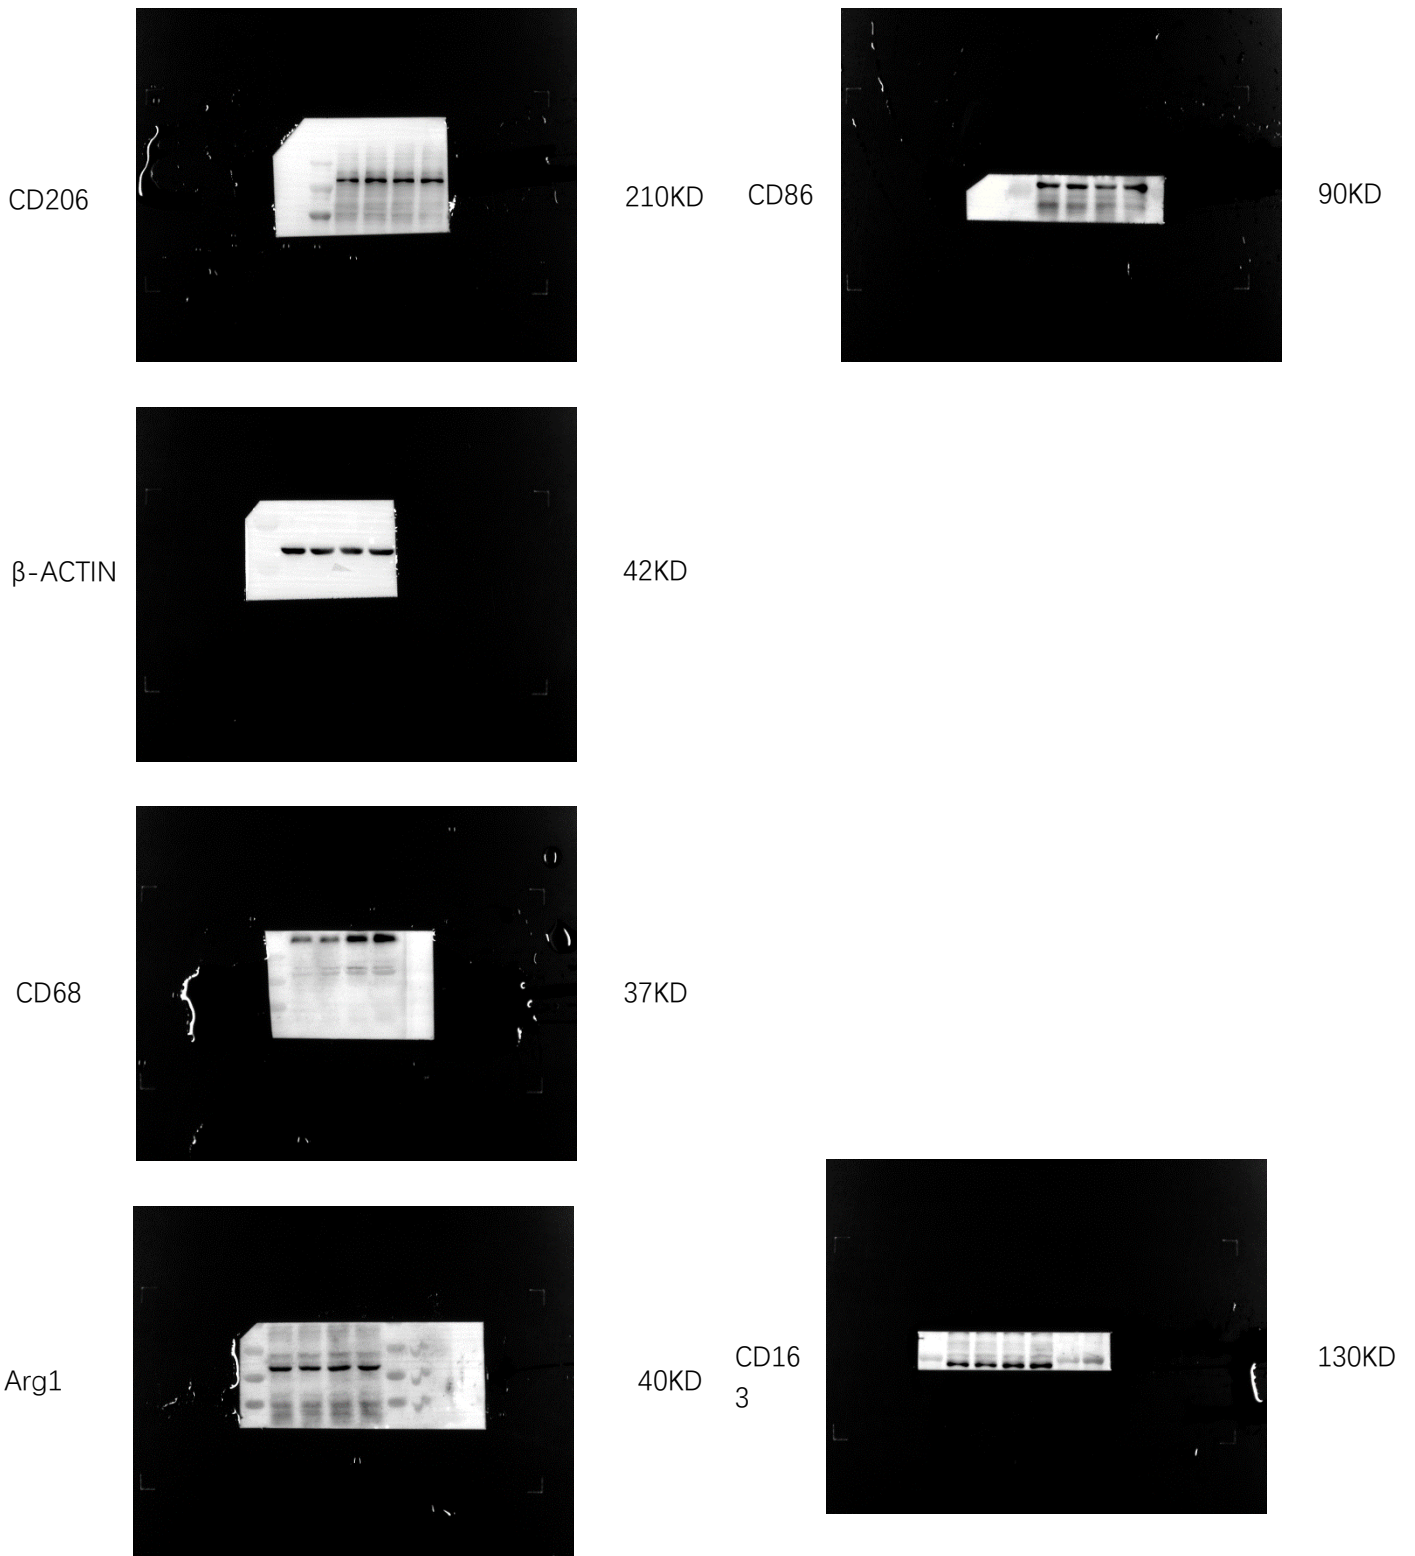



Fig S1

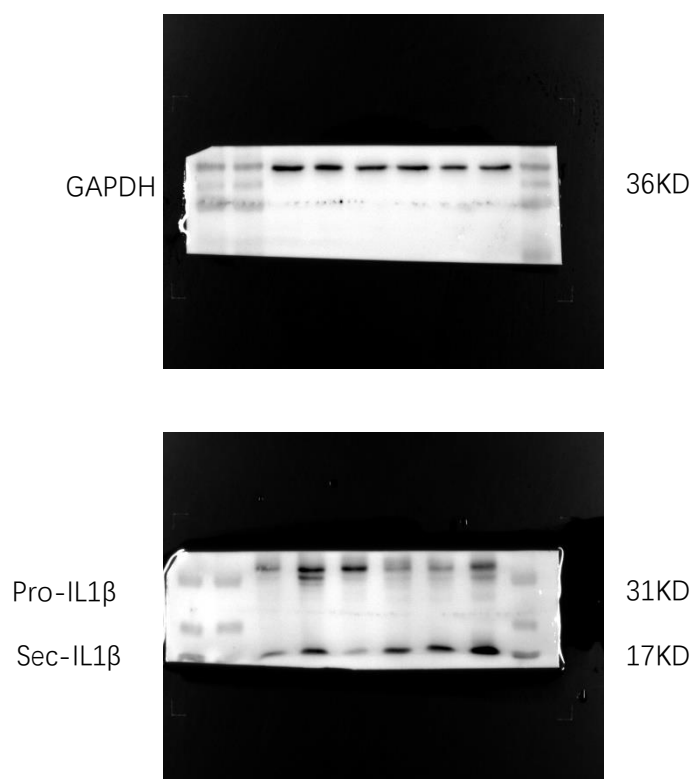

Fig

S3 b

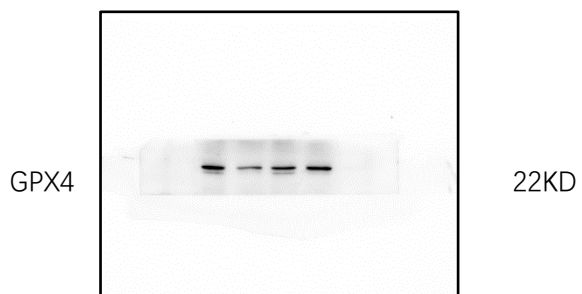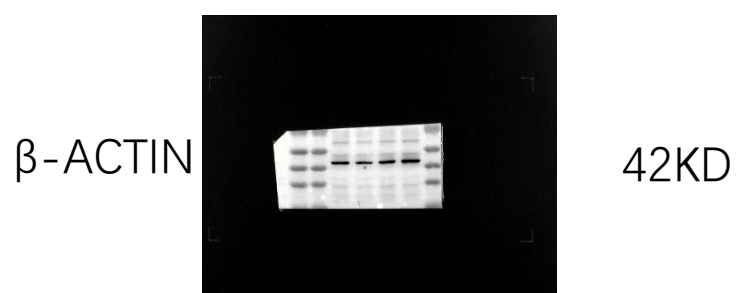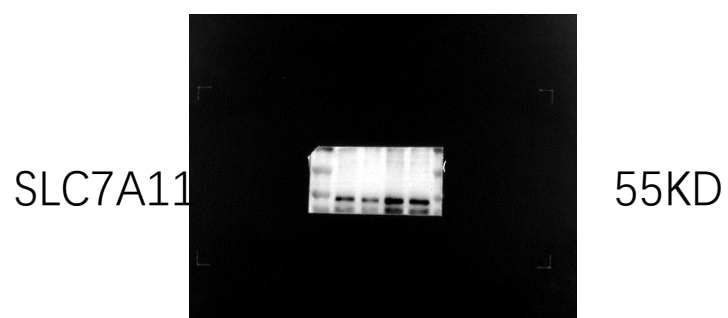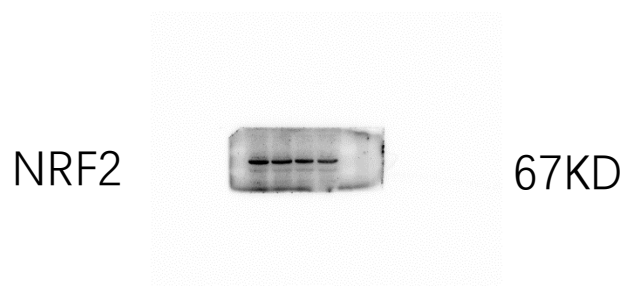

Fig.5 b

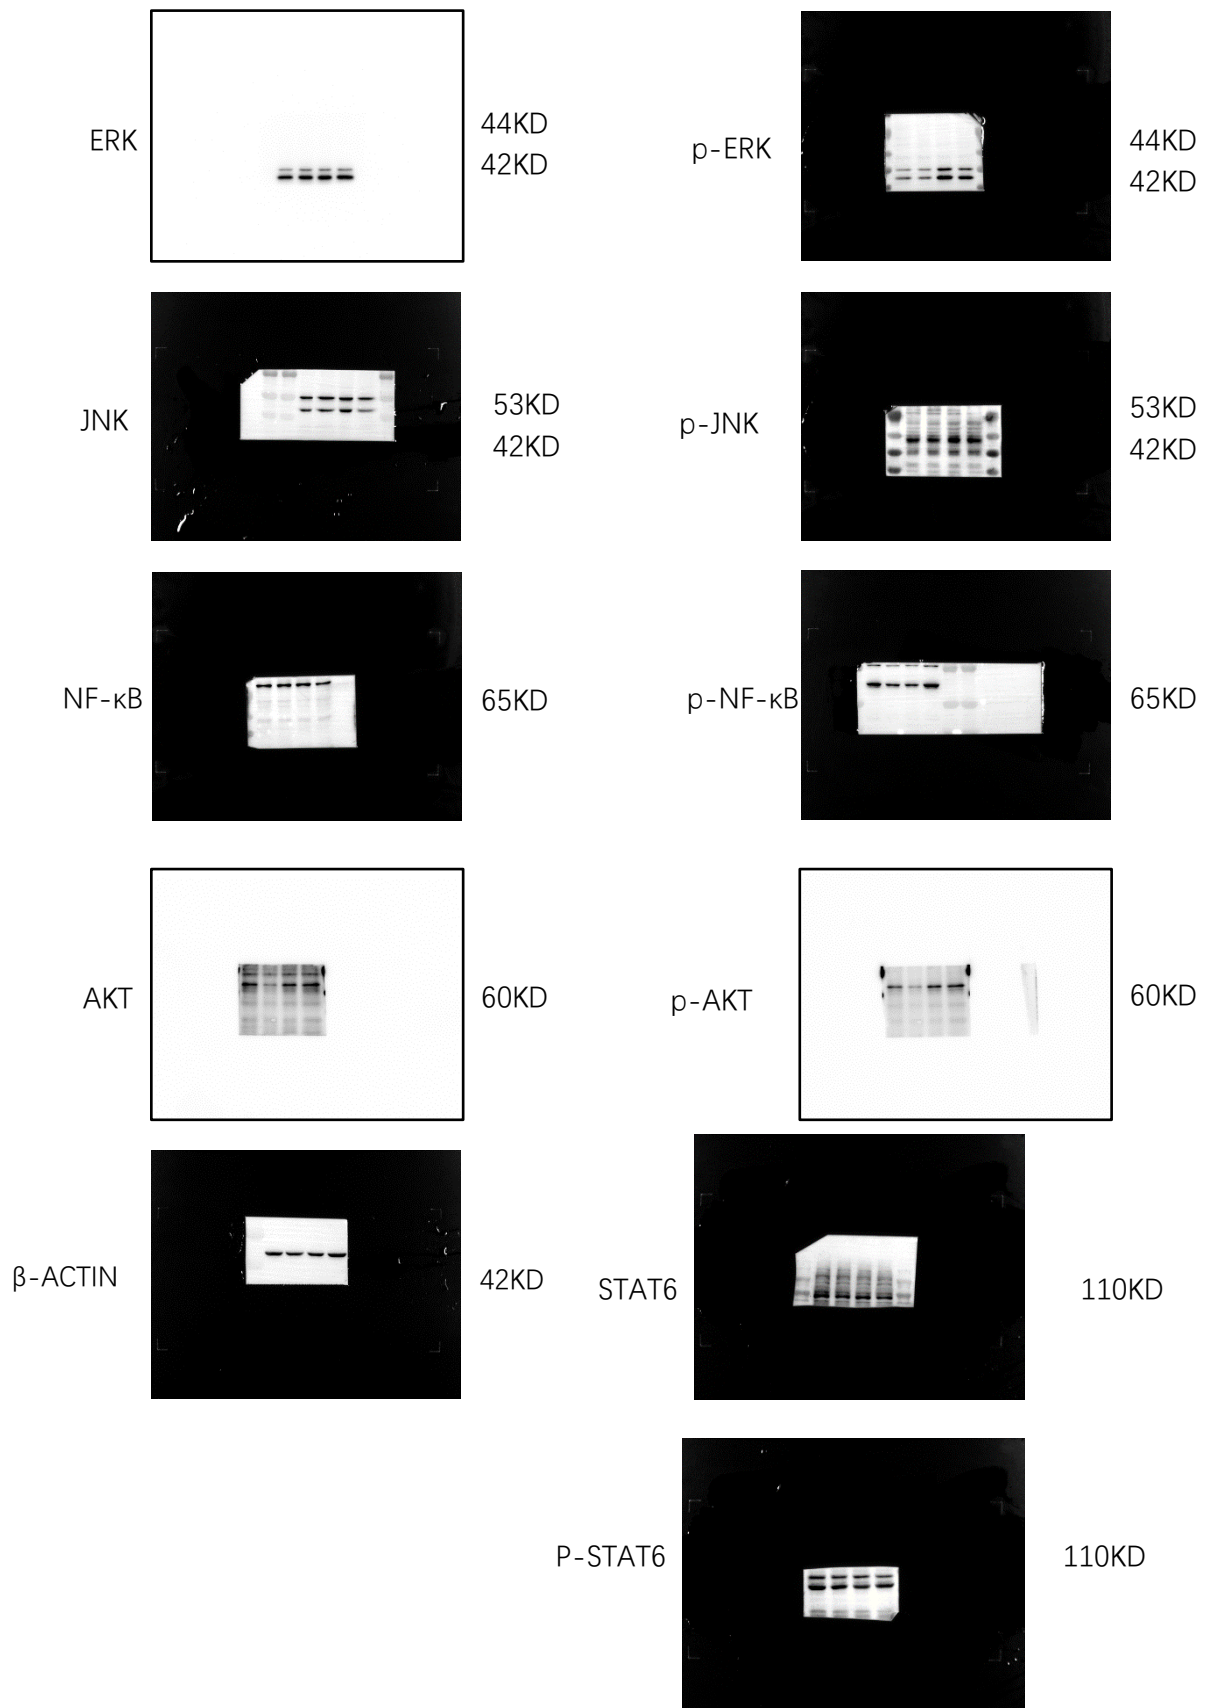

Fig.3 i

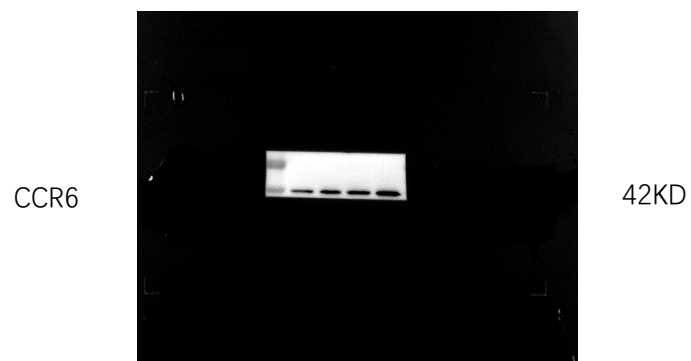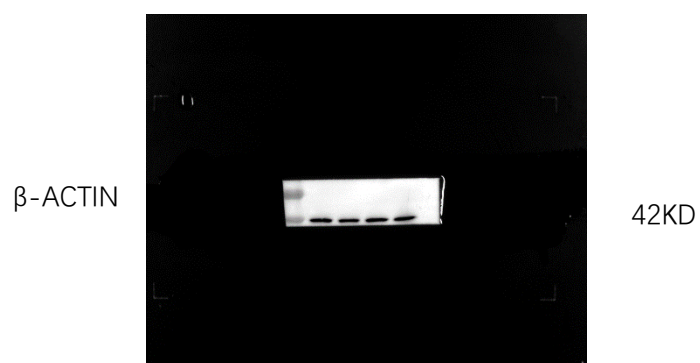

Fig.2

d

HO-1

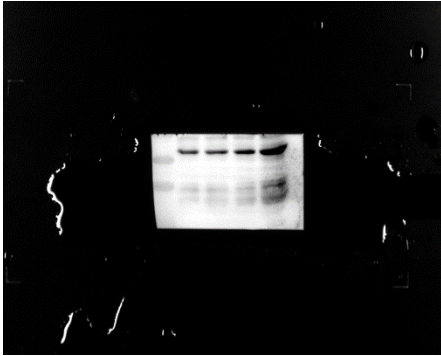

$\beta$ -ACTIN

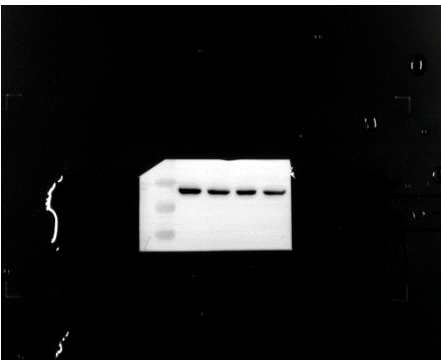

TFRC

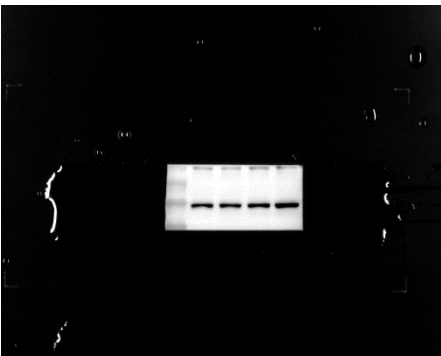

f

33KD

HO-1

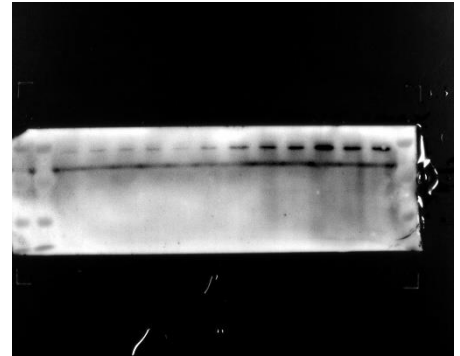

33KD

42KD

$\beta$ -ACTIN

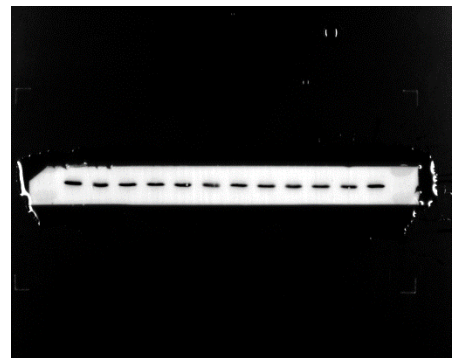

42KD

90KD

TFRC

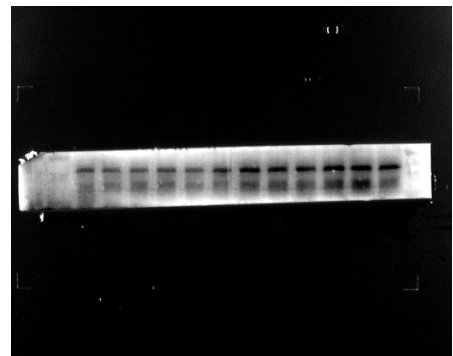

90KD

Fig S4 e

$\beta$ -ACTIN

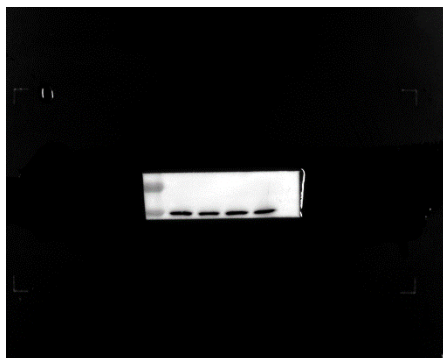

42KD

CCR5

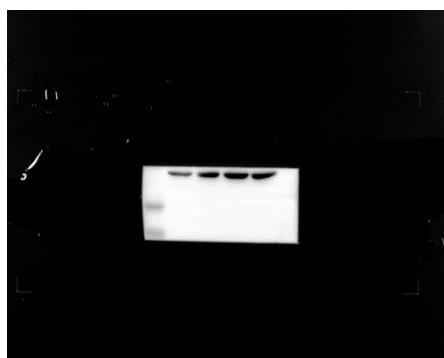

40KD
